# Supplementary material
Source: PubMed Central journal article supplement (PMC3590099)
Supplement: supp_2012.065151_2012_065151-Contributions.pdf [file supp_2012.065151_2012_065151-Contributions.pdf]

**Manuscript no. HAEMATOL/2012/065151 entitled “Transfusion independence and survival in patients with acute myeloid leukemia treated with 5-azacytidine“**

**Authors: Mathilde Gavillet, Jasmine Noetzli, Sabine Blum, Michel A. Duchosal, Olivier Spertini, Jean-François Lambert**

**Information about the contributions of each person named as having participated in the study**

**Guarantor(s)**, i.e., person(s) who is (are) responsible for the integrity of the work as a whole:

- Jean-Francois Lambert, Hematology, CHUV, jean-francois.lambert@chuv.ch
- Mathilde Gavillet, Hematology, CHUV, mathilde.gavillet@chuv.ch
- Jasmine Noetzli, Hematology, CHUV, jasmine.noetzli@chuv.ch

According to the International Committee of Medical Journal Editors (ICMJE)

([http://www.icmje.org/ethical\\_1author.html](http://www.icmje.org/ethical_1author.html)): “*Authorship credit should be based on: 1) substantial contributions to conception and design, acquisition of data, or analysis and interpretation of data; 2) drafting the article or revising it critically for important intellectual content; and 3) final approval of the version to be published. Authors should meet conditions 1, 2, and 3 ..... Acquisition of funding, collection of data, or general supervision of the research group alone does not constitute authorship*”.

**The guarantors of this manuscript confirm that all persons designated as authors qualify for authorship, and that each author has participated sufficiently in the work to take public responsibility for appropriate portions of the content.**

2) Authors who participated in the **conception of the study**: Mathilde Gavillet, Jasmine Noetzli, Jean-François Lambert

3) **Design & Methods**. The following authors were responsible for specific investigations (please detail):

- Mathilde Gavillet, Jasmine Noetzli and Jean-François Lambert were responsible for literature search, study design, data collection and data analysis.
- Sabine Blum, Michel A. Duchosal and Olivier Spertini were responsible for study design.

4) **Results**. The following authors were responsible for specific portions of the results, including figures and tables (please indicate the person responsible for each figure and each table):

- Mathilde Gavillet, Jasmine Noetzli and Jean-François Lambert were responsible data analysis, data interpretation, table 1 and figure 1.
- Sabine Blum, Michel A. Duchosal and Olivier Spertini were responsible for data interpretation.

5) **Writing the manuscript**. The following authors were responsible for writing the manuscript:

- All authors were responsible for writing the manuscript

6) **Contributors Listed in Acknowledgments**:

This work was not funded by external sources.
